# Supplementary material
Source: PubMed Central journal article supplement (PMC3879618)
Supplement: supp_M113.032227_mcp.M113.032227-2.pdf [file supp_M113.032227_mcp.M113.032227-2.pdf]

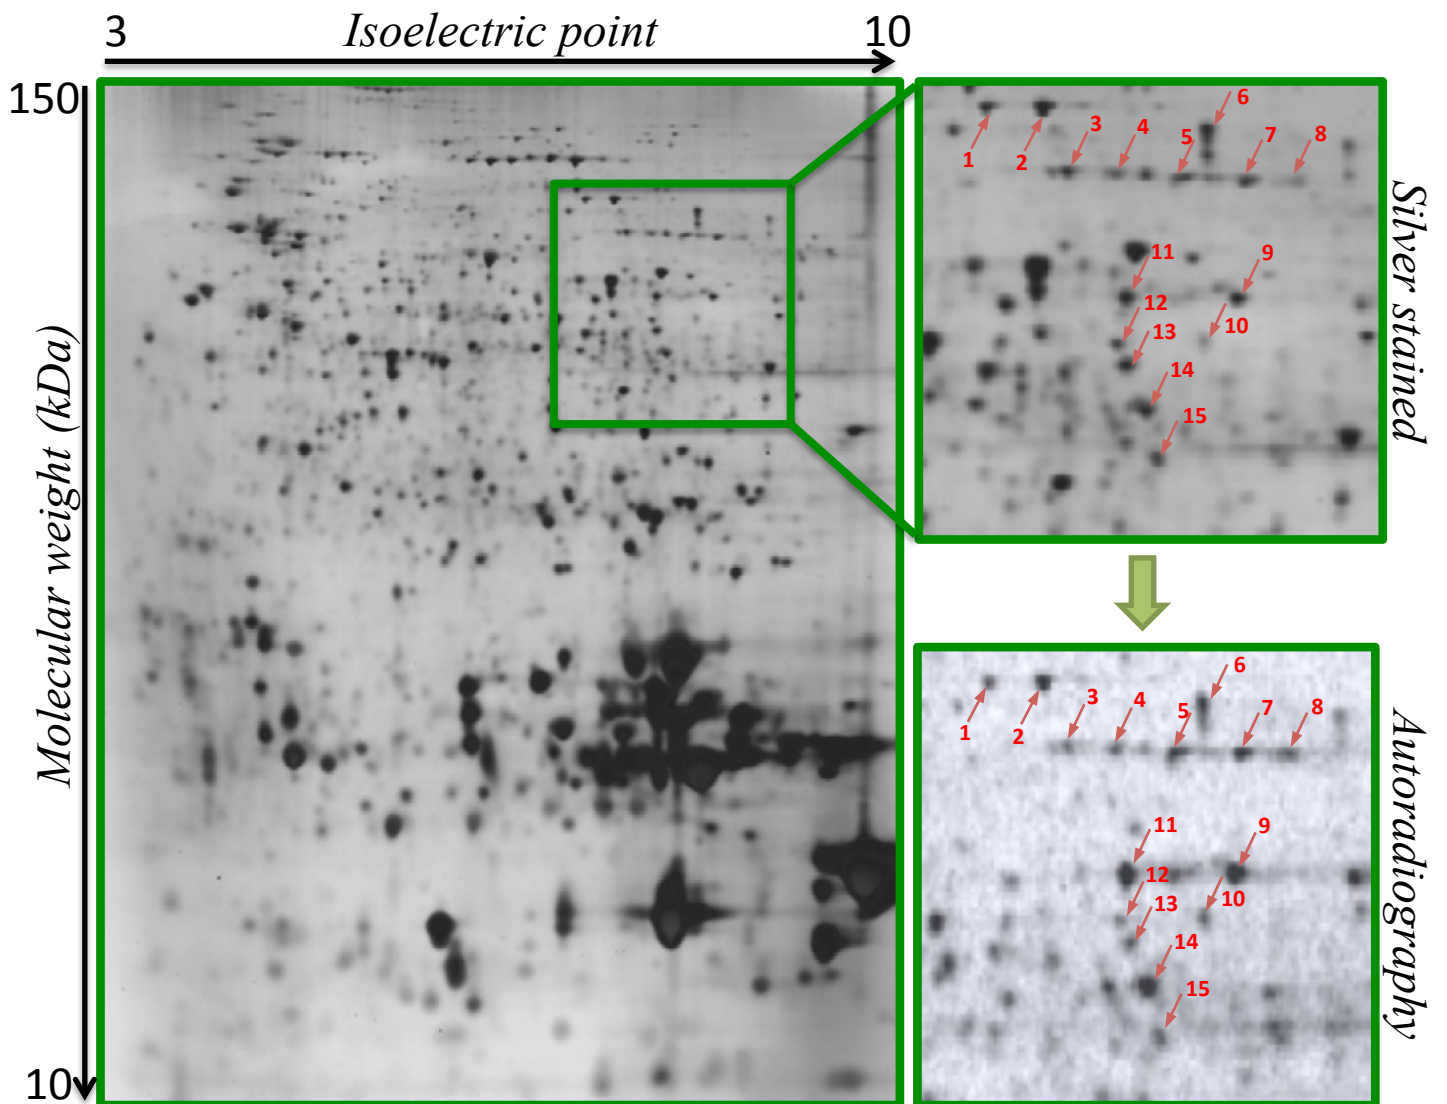

SUPPLEMENTAL FIGURE S1. **Illustration of the correspondences between radiolabeled 2DE protein spots with silver-stained 2DE protein spots in *Arabidopsis* germinating seeds.** In the present case, seeds were imbibed for 24 h with distilled water in the presence of [<sup>35</sup>S]-Met. Proteins were extracted and then submitted to 2-DE, and the radiolabeled proteins were revealed by phosphorimager analysis.

**Incorporation of [<sup>35</sup>S]-Met in proteins neosynthesized in  
*Arabidopsis* germinating seeds 24 HAI**

|              | <b>Water</b>  | <b>α-amanitin</b> | <b>Cycloheximide</b> |
|--------------|---------------|-------------------|----------------------|
| <i>Rep 1</i> | 426,42        | 472,73            | 55,82                |
| <i>Rep 2</i> | 479,28        | 412,78            | 74,19                |
| <i>Rep 3</i> | 456,48        | 456,62            | 69,76                |
| <i>Rep 4</i> | 438,30        | 435,45            | 61,86                |
| Mean         | <b>450,12</b> | <b>444,39</b>     | <b>65,41</b>         |
| SD (+/-)     | 23            | 26                | 8                    |

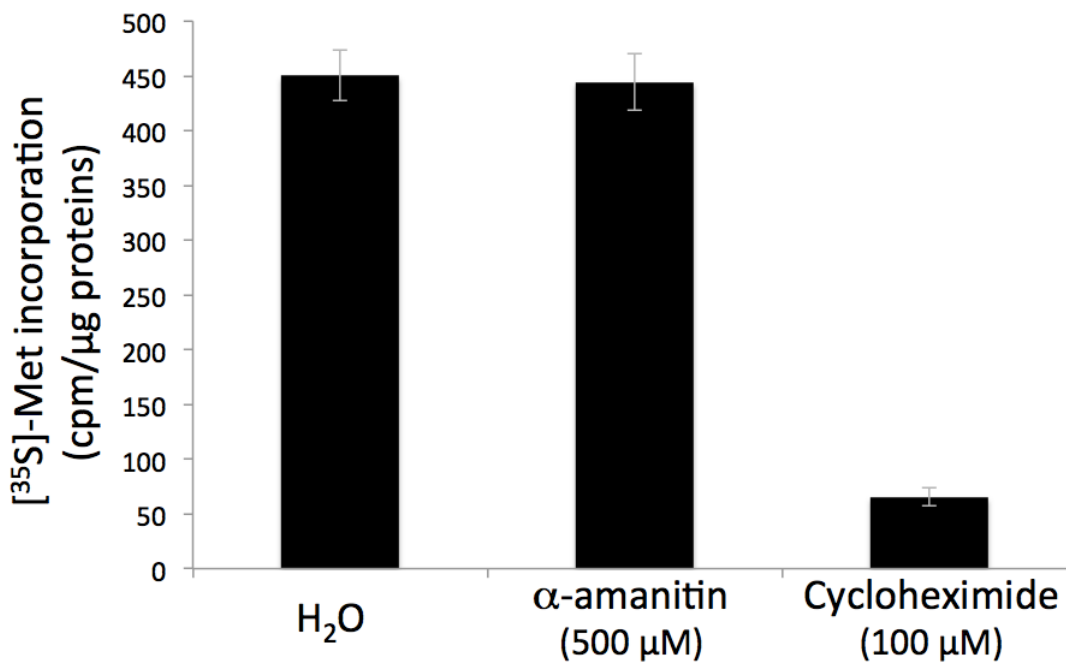

SUPPLEMENTAL FIGURE S2. **Influence of a-amanitin and cycloheximide on the [<sup>35</sup>S]-Met incorporation into neosynthesized proteins in *Arabidopsis* seeds 24 HAI.** In the present case, seeds were imbibed for 24 h either with distilled water, a-amanitin (500 μM) or cycloheximide (100 μM) in the presence of [<sup>35</sup>S]-Met. Following incubation, protein extracts were prepared and protein synthesis was measured by TCA precipitation of aliquots of reaction mixtures spotted on Whatmann GF/C filters; after eight washing steps in cold 5% TCA and 0.04 M sodium pyrophosphate and two washing steps in absolute methanol, filters were dried and counted for radioactivity in a liquid scintillation counter.

## SUPPLEMENTAL FIGURE S2.

### COMMENTS:

The translational activity of germinating seed (24 HAI) has been assessed in the presence of alpha-amanitin as a transcriptional inhibitor or in the presence of cycloheximide as a translation inhibitor. So a new supplemental figure was done (supplemental Fig. S2) to illustrate this point. The translational activity was not affected by alpha-amanitin but a drastic reduction of Met incorporation within germinating seeds was observed in the presence of cycloheximide. By comparison with seeds germinated on water, about 15% of the total translational activity was maintained in the presence of cycloheximide, presumably linked with non-cytoplasmic protein translation (Allorent et al., 2013; Boutry et al., 1984; Demarsy et al., 2012; Ellis, 1977, Law et al., 2012). Moreover, to prevent unspecific protein labeling by free [<sup>35</sup>S]-Met, seed protein extracts were precipitated by TCA/acetone before 2D electrophoresis separation. In addition, each protein sample correspond to single biological replicate. Three biological replicates were realized per biological condition.

1. Allorent, G., Courtois, F., Chevalier, F., Lerbs-Mache, S. (2013) Plastid gene expression during chloroplast differentiation and dedifferentiation into non-photosynthetic plastids during seed formation. *Plant Mol Biol.* **82**, 59-70.
2. Boutry, M., Faber, A.M., Charbonnier, M., Briquet, M. (1984) Microanalysis of plant mitochondrial protein synthesis products. *Plant Mol. Biol.* **3**, 445–452
3. Demarsy, E., Buhr, F., Lambert, E., Lerbs-Mache S. (2002) Characterization of the plastid-specific germination and seedling establishment transcriptional programme. *J Exp Bot.* **63**, 925-939
4. Ellis, R.J (1977) Protein synthesis by isolated chloroplasts. *Biochim. Biophys. Acta.* **463**, 185–215
5. Law, S.R., Narsai, R., Taylor, N.L, Delannoy, E., Carrie, C., Giraud, E., Millar, A.H., Small, I., Whelan, J. (2012) Nucleotide and RNA metabolism prime translational initiation in the earliest events of mitochondrial biogenesis during Arabidopsis germination. *Plant Physiol.* **158**, 1610-1627.

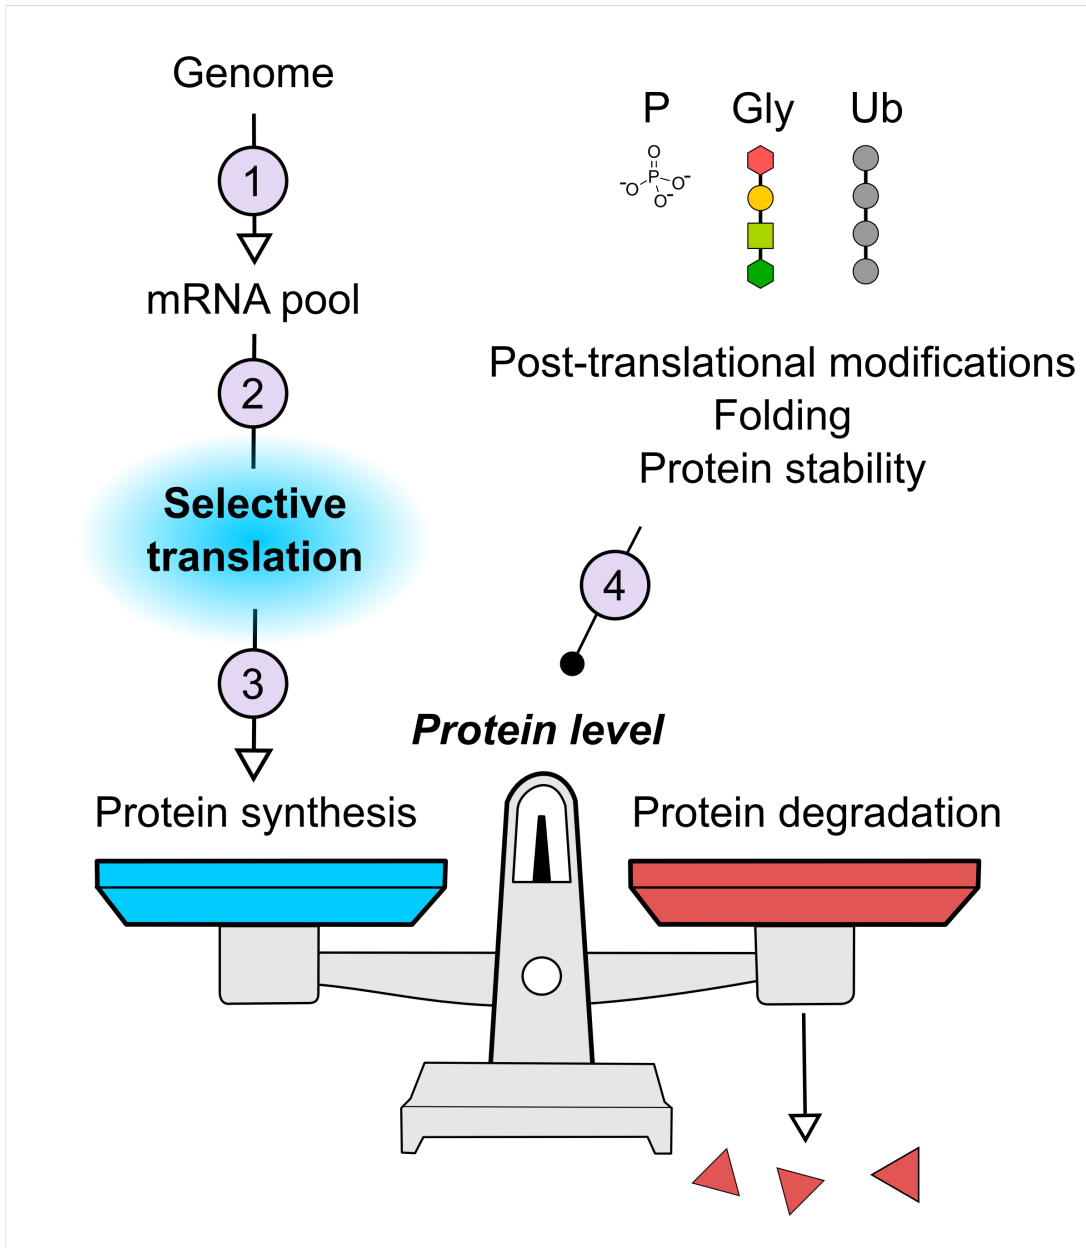

SUPPLEMENTAL FIGURE S3. *Arabidopsis* seed germination is regulated by selective mRNA translation and several transcriptional, post-transcriptional and post-translational mechanisms

## SUPPLEMENTAL FIGURE S3.

### COMMENTS:

Control of *Arabidopsis* seed germination has been shown to rely on several mechanisms. First, transcriptional [1] and post-transcriptional [2] regulations have been demonstrated by the isolation of the *reduced dormancy 4* mutant (*rdo4/hub1*) that monoubiquitinates histone H2B and by the isolation of the *reduced dormancy 2* (*rdo2*) mutant that is deficient in a transcript elongation factor TFIIIS (1, 2). Then, the present data document that mRNA selective translation emerges as an important regulation level in addition to translational control [3] through, per instance, selective action of cap-binding complex such as eIF(iso)4E (118). Therefore, the final protein level at a given time is the difference between the protein synthesis and degradation through 20S proteasome and N-rule pathway (3). Finally, post-translational [4] modifications (*e.g.* phosphorylation, P; glycosylation, Gly; ubiquitination, Ub), protein folding and protein stabilization can also modulate protein activity.

1. Liu, Y., Geyer, R., van Zanten, M., Carles, A., Li, Y., Horold, A., van Nocker, S., and Soppe, W. J. (2011) Identification of the *Arabidopsis* REDUCED DORMANCY 2 gene uncovers a role for the polymerase associated factor 1 complex in seed dormancy. *PLoS One* **6**, e22241
2. Liu, Y., Koornneef, M., and Soppe, W. J. (2007) The absence of histone H2B monoubiquitination in the *Arabidopsis hub1* (*rdo4*) mutant reveals a role for chromatin remodeling in seed dormancy. *Plant Cell* **19**, 433-444
3. Holman, T. J., Jones, P. D., Russell, L., Medhurst, A., Ubeda Tomas, S., Talloji, P., Marquez, J., Schmuths, H., Tung, S. A., Taylor, I., Footitt, S., Bachmair, A., Theodoulou, F. L., and Holdsworth, M. J. (2009) The N-end rule pathway promotes seed germination and establishment through removal of ABA sensitivity in *Arabidopsis*. *Proc. Natl. Acad. Sci. U.S.A.* **106**, 4549-4554
